# Supplementary material for: Flexible Polycarbonate and Copoly(Imide‐Carbonate)s‐Based Frequency Selective Surface for Electromagnetic Shielding Application
Source: Hindawi journal article supplement (doi:10.1155/2024/3463252), 2024-01-01
Supplement: f1 [file 3463252.f1.docx]

**Flexible Polycarbonate and Copoly(imide-carbonate)s based Frequency Selective Surface for Electromagnetic Shielding Application**

**A. Murugesan1,2*, S. Ramprabhu3, P. Senthil Kumar4***

*1Polymer Science and Engineering Lab, Department of Chemistry, Sri Sivasubramaniya Nadar College of Engineering, Kalavakkam - 603110, Tamil Nadu, India.*

*2Centre of Excellence in Water Research (CEWAR), Sri Sivasubramaniya Nadar College of Engineering, Kalavakkam - 603110, Tamil Nadu, India.*

*3Department of Electronics Engineering, Madras Institute of Technology Campus, Anna University Chennai - 600 044, Tamil Nadu, India.*

*4Centre for Pollution Control and Environmental Engineering, School of Engineering and Technology, Pondicherry University, Kalapet, Puducherry- 605014, India.*

*Corresponding author: [murugesana@ssn.edu.in](mailto:murugesana@ssn.edu.in) (A. Murugesan);

[senthilkumarp@pondiuni.ac.in](mailto:senthilkumarp@pondiuni.ac.in); [senthilchem8582@gmail.com](mailto:senthilchem8582@gmail.com) (P. Senthil Kumar)


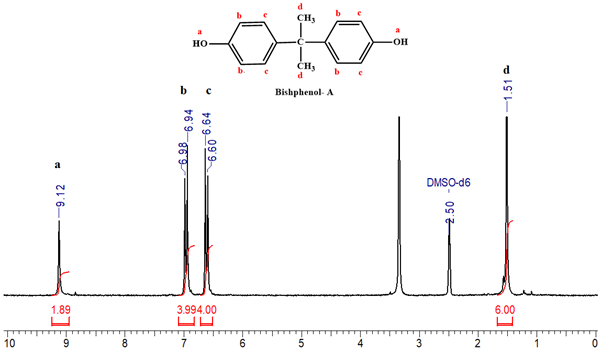


**Figure S1. 1H-NMR spectrum of compound BPA**


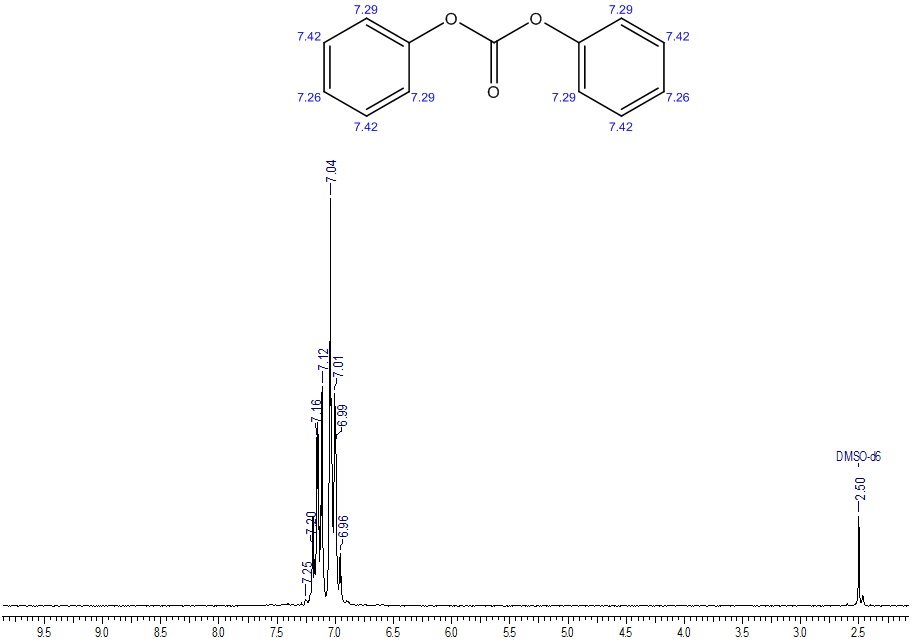


**Figure S2. 1H-NMR spectrum of compound DPC**


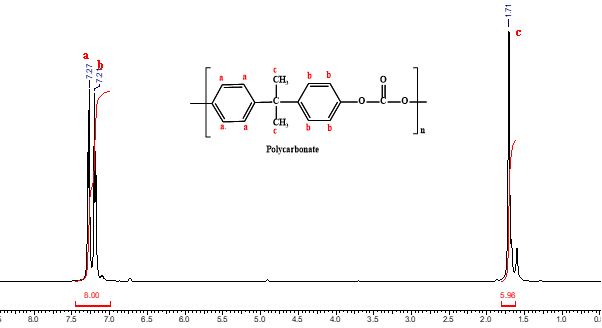


**Figure S3. 1H-NMR spectrum of polycarbonates**


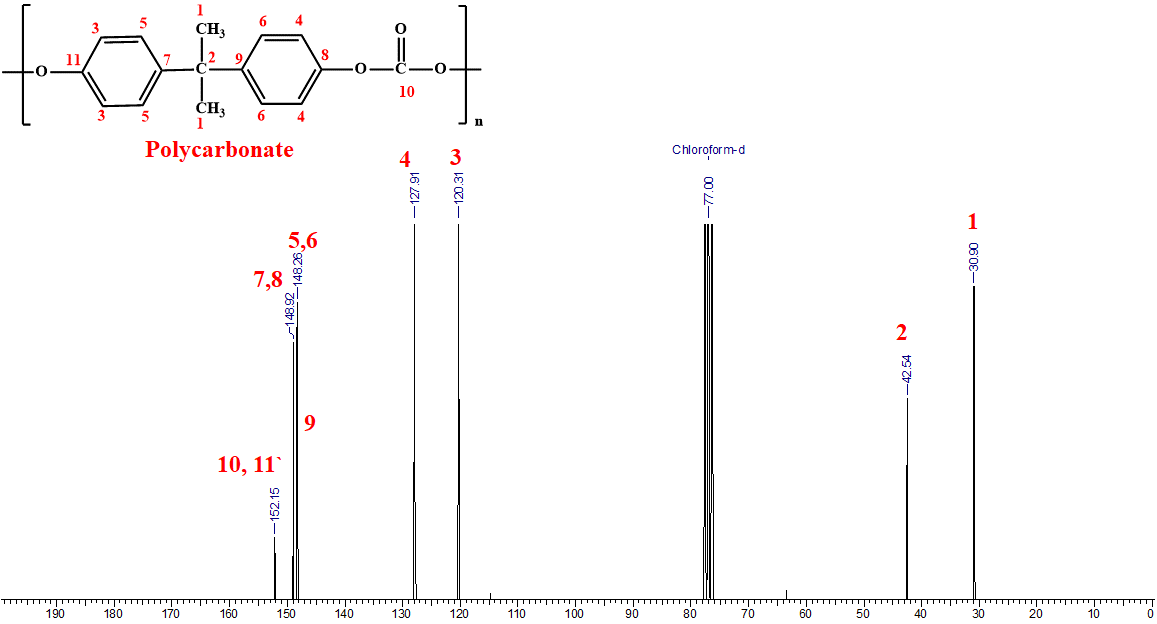


**Figure S4. 13C-NMR spectrum of polycarbonates**
